# Supplementary material
Source: PubMed Central journal article supplement (PMC4827601)
Supplement: NIHMS769642-supplement-Supplementary_table_1.pdf [file NIHMS769642-supplement-Supplementary_table_1.pdf]

## Supplementary Materials

Supplementary Table 1 – Bivariate analysis of problem-gambling severity and individual problem-shopping items among past-year shoppers (APRS and non-ARPS)

| <i>Shopping Item</i>                                                                                 | <b>Total (%)</b> | <b>NG (%)</b> | <b>LRG (%)</b> | <b>ARPG (%)</b> | <b>x<sup>2</sup></b> | <b>p</b> |
|------------------------------------------------------------------------------------------------------|------------------|---------------|----------------|-----------------|----------------------|----------|
| 1- Have you ever tried to cut back on buying things?                                                 | 18.0             | 19.5          | 16.9           | 19.6            | 1.52                 | 0.4681   |
| 2- Has a family member ever expressed concern about the amount of time you spend shopping?           | 22.7             | 26.7          | 20.6           | 24.9            | 4.84                 | 0.0888   |
| 3- Have you ever missed school, work or other important social activities because you were shopping? | 18.6             | 16.7          | 17.6           | 21.8            | 3.47                 | 0.1761   |
| 4- Do you think you have a problem with excessive shopping?                                          | 8.2              | 9.1           | 6.6            | 11.3            | 7.53                 | 0.023    |
| 5- Have you ever experienced an irresistible urge or uncontrollable need to buy things?              | 20.9             | 24.3          | 19.8           | 21.3            | 2.05                 | 0.3587   |
| 6- Have you ever experienced a growing tension or anxiety that can only be relieved by shopping?     | 13.8             | 14.8          | 12.1           | 17.0            | 5.1435               | 0.0764   |

NG = non-gambling; LRG = low-risk gambling; ARPG = at-risk/problem gambling
