# Supplementary material
Source: PubMed Central journal article supplement (PMC4827601)
Supplement: NIHMS769642-supplement-Supplementary_table_2.pdf [file NIHMS769642-supplement-Supplementary_table_2.pdf]

Supplementary Table 2 – Bivariate analyses of problem-gambling severity and health/functioning measures among adolescents with and without ARPS

| Variable                        | ARPS |      |     |      |      |      |       |        | Non-ARPS |      |     |      |      |      |       |        |
|---------------------------------|------|------|-----|------|------|------|-------|--------|----------|------|-----|------|------|------|-------|--------|
|                                 | NG   |      | LRG |      | ARPG |      | $X^2$ | $p$    | NG       |      | LRG |      | ARPG |      | $X^2$ | $p$    |
|                                 | N    | %    | N   | %    | N    | %    |       |        | N        | %    | N   | %    | N    | %    |       |        |
| <b>Academic/extracurricular</b> |      |      |     |      |      |      |       |        |          |      |     |      |      |      |       |        |
| <i>Grade average</i>            |      |      |     |      |      |      |       |        |          |      |     |      |      |      |       |        |
| Mainly A's & B's                | 66   | 67.4 | 190 | 57.1 | 79   | 51.3 | 6.32  | 0.04   | 162      | 61.1 | 459 | 57.7 | 221  | 44.3 | 24.46 | <.0001 |
| Paid part-time job              | 56   | 57.1 | 168 | 50.2 | 86   | 53.4 | 1.62  | 0.44   | 175      | 66.0 | 461 | 57.4 | 228  | 56.4 | 7.29  | 0.03   |
| Other extracurricular           | 73   | 73.7 | 261 | 76.5 | 124  | 76.5 | 0.36  | 0.84   | 181      | 66.5 | 622 | 76.3 | 329  | 80.1 | 16.71 | <0.001 |
| <b>Mood</b>                     |      |      |     |      |      |      |       |        |          |      |     |      |      |      |       |        |
| Dysphoria/Depression            | 33   | 35.5 | 99  | 30.5 | 62   | 40.8 | 5.02  | 0.08   | 36       | 14.2 | 135 | 17.4 | 84   | 21.8 | 6.47  | 0.04   |
| <b>Aggression</b>               |      |      |     |      |      |      |       |        |          |      |     |      |      |      |       |        |
|                                 | 18   | 18.4 | 72  | 21.5 | 88   | 55.4 | 66.41 | <.0001 | 28       | 10.6 | 203 | 25.1 | 168  | 41.5 | 80.85 | <.0001 |
| <b>Substance Use</b>            |      |      |     |      |      |      |       |        |          |      |     |      |      |      |       |        |
| <i>Smoking, lifetime</i>        |      |      |     |      |      |      |       |        |          |      |     |      |      |      |       |        |
| Never                           | 55   | 59.1 | 171 | 51.4 | 51   | 32.9 | 27.04 | <.0001 | 199      | 76.8 | 496 | 61.9 | 224  | 55.6 | 31.54 | <.0001 |
| Occasionally                    | 26   | 28.0 | 110 | 33.0 | 56   | 36.1 |       |        | 35       | 13.5 | 181 | 22.6 | 111  | 27.5 |       |        |
| Regularly                       | 12   | 12.9 | 52  | 15.6 | 48   | 31.0 |       |        | 25       | 9.7  | 124 | 15.5 | 68   | 16.9 |       |        |
| Marijuana, lifetime             | 38   | 40.3 | 155 | 47.6 | 90   | 58.4 | 8.51  | 0.01   | 63       | 25.6 | 314 | 40.9 | 196  | 51.3 | 40.85 | <.0001 |
| Alcohol, lifetime               | 74   | 79.6 | 312 | 95.1 | 142  | 91.6 | 22.94 | <.0001 | 177      | 70.0 | 676 | 88.6 | 346  | 89.2 | 59.06 | <.0001 |
| <i>Alcohol, current</i>         |      |      |     |      |      |      |       |        |          |      |     |      |      |      |       |        |
| Never regular                   | 14   | 27.0 | 66  | 25.1 | 30   | 28.6 | 7.48  | 0.28   | 44       | 45.8 | 176 | 33.3 | 60   | 21.4 | 35.45 | <.0001 |
| Light                           | 15   | 28.9 | 72  | 27.4 | 30   | 28.6 |       |        | 30       | 31.3 | 145 | 27.4 | 74   | 26.4 |       |        |
| Moderate                        | 20   | 38.5 | 86  | 32.7 | 25   | 23.8 |       |        | 14       | 14.6 | 152 | 28.8 | 96   | 34.3 |       |        |
| Heavy                           | 3    | 5.8  | 39  | 14.8 | 20   | 19.1 |       |        | 8        | 8.3  | 56  | 10.6 | 50   | 17.9 |       |        |
| Other drug, lifetime            | 9    | 11.1 | 30  | 11.8 | 36   | 28.4 | 19.04 | <.0001 | 12       | 5.4  | 64  | 9.7  | 61   | 19.3 | 29.39 | <.0001 |
| <i>Caffeine use</i>             |      |      |     |      |      |      |       |        |          |      |     |      |      |      |       |        |
| None                            | 18   | 19.0 | 58  | 17.4 | 19   | 12.0 | 10.74 | 0.03   | 97       | 37.0 | 149 | 18.5 | 89   | 22.2 | 64.98 | <.0001 |
| 1-2 per day                     | 53   | 55.8 | 167 | 50.2 | 70   | 44.3 |       |        | 132      | 50.4 | 443 | 55.1 | 175  | 43.6 |       |        |
| 3+ per day                      | 24   | 25.3 | 108 | 32.4 | 69   | 43.7 |       |        | 33       | 12.6 | 212 | 26.4 | 137  | 34.2 |       |        |

ARPS = at-risk/problem shopping; NG = non-gambling; LRG = low-risk gambling; ARPG = at-risk/problem gambling
