# Supplementary material
Source: PubMed Central journal article supplement (PMC4827601)
Supplement: NIHMS769642-supplement-Supplementary_table_3.pdf [file NIHMS769642-supplement-Supplementary_table_3.pdf]

Supplementary Table 3 – Bivariate comparisons of problem-gambling severity and gambling behaviors, urges and motivations among adolescents with and without ARPS

| Variable                              | ARPS |      |      |      |       |        | Non-ARPS |      |      |      |        |        |
|---------------------------------------|------|------|------|------|-------|--------|----------|------|------|------|--------|--------|
|                                       | LRG  |      | ARPG |      | $X^2$ | $p$    | LRG      |      | ARPG |      | $X^2$  | $p$    |
| N                                     | %    | N    | %    | N    |       |        | %        | N    | %    |      |        |        |
| <b>Gambling Online</b>                | 35   | 10.3 | 54   | 34.2 | 41.92 | <.0001 | 112      | 13.9 | 140  | 34.7 | 70.70  | <.0001 |
| <b>Gambling Urges</b>                 |      |      |      |      |       |        |          |      |      |      |        |        |
| Pressure                              | 13   | 3.9  | 29   | 18.1 | 28.67 | <.0001 | 36       | 4.4  | 72   | 17.8 | 59.62  | <.0001 |
| Anxiety                               | 3    | 1.0  | 26   | 17.2 | 45.17 | <.0001 | 7        | 0.9  | 54   | 13.9 | 83.35  | <.0001 |
| <b>Gambling Motivations</b>           |      |      |      |      |       |        |          |      |      |      |        |        |
| Excitement                            | 192  | 56.3 | 137  | 84.6 | 38.77 | <.0001 | 517      | 63.4 | 343  | 83.5 | 52.59  | <.0001 |
| Financial                             | 149  | 43.7 | 110  | 67.9 | 25.76 | <.0001 | 355      | 43.6 | 319  | 77.6 | 128.03 | <.0001 |
| Escape                                | 82   | 24.1 | 87   | 53.7 | 43.30 | <.0001 | 181      | 22.2 | 173  | 42.1 | 53.60  | <.0001 |
| Social                                | 107  | 31.4 | 79   | 48.8 | 14.25 | <.001  | 282      | 34.6 | 217  | 52.8 | 37.48  | <.0001 |
| <b>Gambling Partners</b>              |      |      |      |      |       |        |          |      |      |      |        |        |
| Family                                | 150  | 44.0 | 86   | 53.1 | 3.65  | 0.06   | 331      | 40.6 | 226  | 55.0 | 22.77  | <.0001 |
| Friends                               | 216  | 63.3 | 124  | 76.5 | 8.74  | <.01   | 563      | 69.1 | 344  | 83.7 | 30.33  | <.0001 |
| Alone                                 | 11   | 3.2  | 33   | 20.4 | 40.44 | <.0001 | 39       | 4.8  | 65   | 15.8 | 42.82  | <.0001 |
| <b>Gambling Duration (hours/week)</b> |      |      |      |      |       |        |          |      |      |      |        |        |
| < 1 hour                              | 258  | 94.9 | 107  | 71.8 | 44.32 | <.0001 | 624      | 91.5 | 253  | 66.2 | 107.89 | <.0001 |
| 2+ hours                              | 14   | 5.2  | 42   | 28.2 |       |        | 58       | 8.5  | 129  | 33.8 |        |        |

ARPS = at-risk/problem shopping; LRG = low-risk gambling; ARPG = at-risk/problem gambling
